# Supplementary material
Source: Springer Nature journal article supplement (https://www.springermedizin.de/resource/supplementary/12879_2013_3133_MOESM4_ESM.pdf/9446062)

A

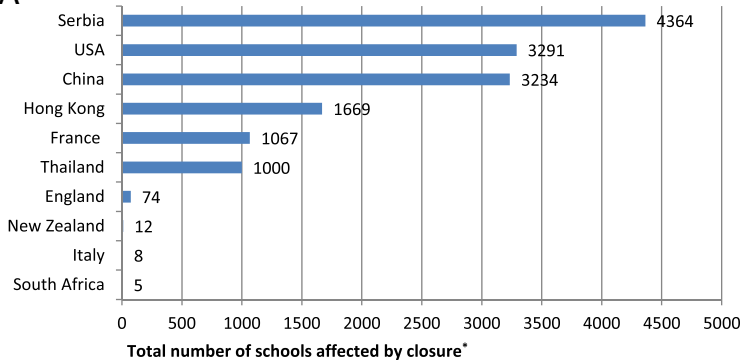

B

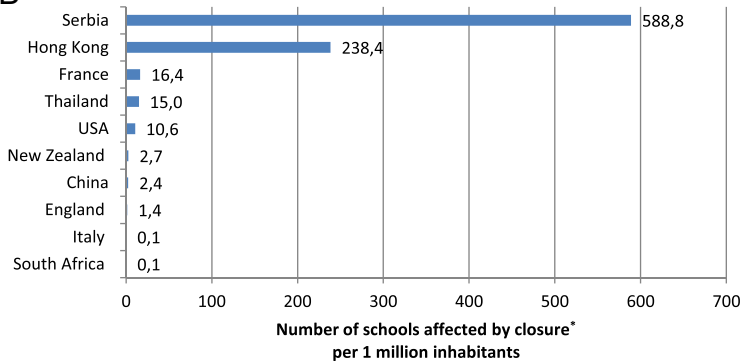

Supplement: MOESM4 [file 9446062]
